# Supplementary material
Source: PubMed Central journal article supplement (PMC8748399)
Supplement: NIHMS1761736-supplement-1.pdf [file NIHMS1761736-supplement-1.pdf]

1 **Table E1. Adjusted associations Between Participant Characteristics and Timing of**  
 2 **Introduction of specific allergen:**

|                                                                                                                  | <b>Peanut</b>              | <b>Milk</b>                | <b>Egg</b>                 |
|------------------------------------------------------------------------------------------------------------------|----------------------------|----------------------------|----------------------------|
| <b>Participant Characteristics Associated with: Early Introduction of specific allergen (6 months or before)</b> | <b>Odds Ratio (95% CI)</b> | <b>Odds Ratio (95% CI)</b> | <b>Odds Ratio (95% CI)</b> |
| <b>White (vs Black)</b>                                                                                          | 2.6 (1.1-7.2)*             | 2.7 (1.1-6.7)*             | 3.3 (1.0-14.9)             |
| <b>Age (continuous--in years)</b>                                                                                | 0.8 (0.7-0.9)*             | 0.9 (0.8-1.0)              | 0.8 (0.7-1.0)*             |
| <b>Multiple (vs single) Food Allergies</b>                                                                       | 1.5 (0.6-3.7)              | 0.8 (0.3-2.5)              | 0.8 (0.7-1.0)              |
| <b>Female (vs Male)</b>                                                                                          | 1.9 (0.9-3.9)              | 1.0 (0.4-2.5)              | 1.3 (0.5-3.1)              |
| <b>Eczema (vs no eczema)</b>                                                                                     | 1.0 (0.4-2.8)              | 4.7 (1.4-19.5)*            | 0.6 (0.2-1.7)              |
|                                                                                                                  |                            |                            |                            |
| <b>Patient Characteristics Associated with: Later introduction of specific allergen (after 11 months of age)</b> |                            |                            |                            |
| <b>White (vs Black)</b>                                                                                          | 0.3 (0.1-0.5)*             | 0.2 (0.1-0.6)*             | 0.5 (0.2-1.2)              |
| <b>Age (continuous--in years)</b>                                                                                | 1.3 (1.2-1.5)*             | 1.1 (1.0-1.2)              | 1.3 (1.1-1.5)              |
| <b>Multiple (vs single) Food Allergies</b>                                                                       | 0.9 (0.5-1.8)              | 1.6 (0.5-6.0)              | 3.0 (1.0-10.8)             |
| <b>Female (vs Male)</b>                                                                                          | 0.6 (0.4-1.2)              | 1.1 (0.4-2.6)              | 0.6 (0.3-1.4)              |
| <b>Eczema (vs no eczema)</b>                                                                                     | 0.8 (0.4-1.9)              | 0.4 (0.1-1.2)              | 2.1 (0.7-6.5)              |

3 CI: Confidence Interval

4 Note: Model also includes fixed effects adjustment for study recruitment site

5 \* Variable is a statistically significant predictor of model-specific food allergen introduction  
 6 timing at a two-sided p<.05

7

**Figure E1:** Racial Differences in Reported Timing of Peanut Introduction by child race and birth-year [Estimated % (95% Confidence Interval)]

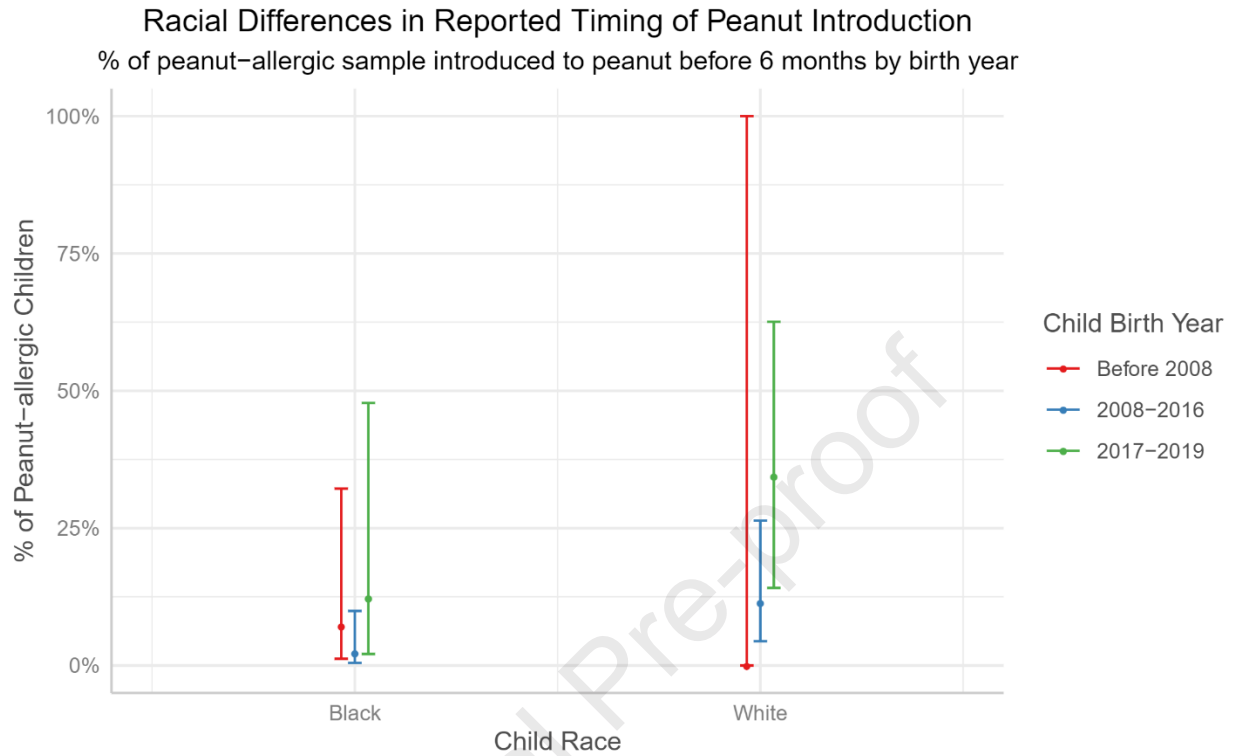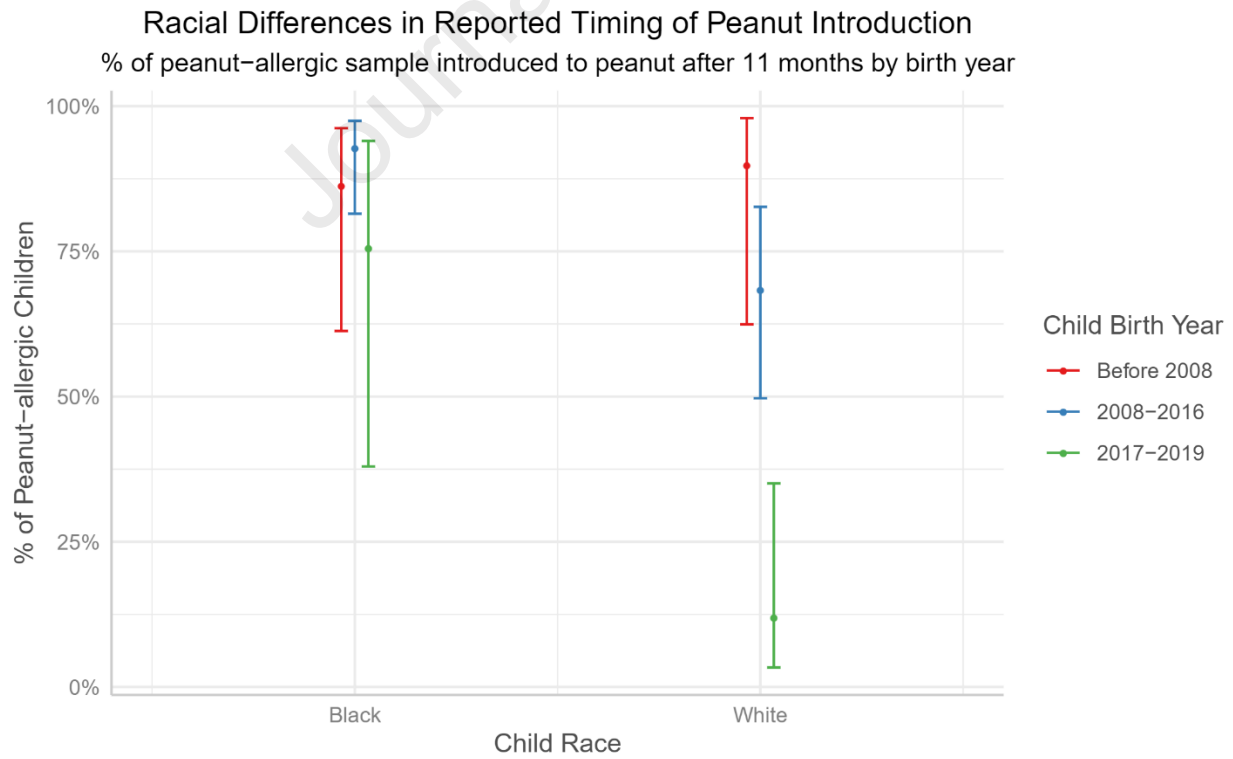

---

**Figure E1 Legend:** Racial Differences in Reported Timing of Peanut Introduction by child race and birth-year [Estimated % (95% Confidence Interval)]

Journal Pre-proof
